# Supplementary material
Source: PubMed Central journal article supplement (PMC3562829)
Supplement: 1221892110_pnas.201221892SI.pdf [file 1221892110_pnas.201221892SI.pdf]

# Supporting Information

Yu et al. 10.1073/pnas.1221892110

## SI Conclusions

Plant leaves are colonized by an abundance of microorganisms including *Pseudomonas syringae*, which is a model bacterial foliar pathogen and a common resident on plants. *P. syringae* strain B728a is a pathogen of beans and is particularly well adapted for growth both on leaf surfaces and in the apoplast, i.e., the leaf intercellular spaces. This work explores the prediction that leaf-surface, or epiphytic, sites offer a distinct environment for *P. syringae* that differs from apoplastic sites. Bacteria in epiphytic sites likely experience fluctuations in water availability, temperature, and solar UV radiation, as well as frequent nutrient limitation. In contrast, the apoplastic environment may be dominated by plant defense responses that expose bacteria to antimicrobial compounds such as hydrogen peroxide and superoxide. We used global transcriptome profiling of *P. syringae* B728a cells recovered from plants to understand the environmental conditions in epiphytic and apoplastic sites and how the cells respond to these conditions. We compared the transcriptome profiles of cells from plants with those of cells grown in pure cultures and exposed to individual stress conditions predicted to occur in leaf habitats, namely oxidative stress and water, iron, and nitrogen limitation. Our results provide evidence that these two plant habitats offer distinct environments for the bacteria and thus present distinct driving forces for *P. syringae* adaptation.

The transcript profiles of *P. syringae* B728a support a model in which epiphytic sites specifically favor flagellar motility, chemosensing, and chemotaxis (Fig. S8). This model suggests active relocation of bacteria to nutrient-rich sites as well as movement that promotes entry into the apoplast through the stomata. In contrast, the suppression of most chemosensing and chemotaxis genes in the apoplast suggests a relatively uniform nutritional environment in the leaf interior. The transcript profiles support the production of two *P. syringae* surfactants, with synthesis of the surfactant 3-(3-hydroxyalkanoyloxy)alkanoic acid favored on leaf surfaces and likely contributing to swarming motility and with syringafactin synthesis favored in the apoplast. Our results are surprising in their support for an exceptionally high level of phenylalanine catabolism on leaf surfaces. Such catabolism may function to reduce the pool of this critical precursor to phenylpropanoid compounds involved in plant defense, thus suggesting that B728a works to counteract defense responses before its entry into leaves. Also, the transcript profiles suggest that leaf surfaces offer a nutritional environment that promotes active scavenging of foliar phosphate and utilization of plant-derived indole as a source of tryptophan.

Following entry of *P. syringae* B728a into the leaf interior, B728a shifts its expression profile to favor a distinct set of

traits. It increases the expression of genes for the degradation of the alternate amino acid GABA. GABA catabolism provides nutritional benefit but also could function in minimizing the repressive effect of GABA on virulence. The expression of biosynthetic genes for secondary metabolites is increased appreciably in the apoplast, thus supporting the known role of the two phytotoxins, syringomycin and syringopeptin, in B728a virulence and suggesting roles for several secondary metabolites. Transcript profiles suggest a major increase in syringolin A synthesis in the apoplast. This metabolite is known to reverse an initial step in plant defense, namely closing the stomata to exclude invading bacteria. High syringolin A gene expression following entry to the leaf interior suggests syringolin A-mediated suppression of additional plant defenses beyond stomatal closure and possibly promotion of stomatal opening to enhance movement back onto the leaf surface after apoplast colonization. Finally, the transcriptome profiles revealed that phage-related genes within the B728a genome are preferentially activated in the apoplast, suggesting opportunities for phage-mediated gene transfer and even pathogen control.

A comparison of the transcriptomes from the *in planta* cells with the transcriptomes of cultured cells exposed to individual stresses provided insights into the environmental stresses that B728a encounters in these leaf habitats. Most notably, cells in both surface and interior sites are clearly limited for water, with the profiles of individual gene transcripts suggesting that cells in epiphytic sites experience greater fluctuations in water availability but less severe shortages of water than cells in the apoplast. This difference was reflected, in part, by the strong expression of genes for compatible solute synthesis, with particularly high expression in the apoplast. In contrast to water, B728a cells on leaves were not limited for iron nor strongly affected by oxidative stress, although they synthesized a set of antioxidant enzymes that were distinct from those made in culture, with particularly high expression in the apoplast. They also were not in a physiological state of starvation as great as that of nitrogen-starved cells in culture, despite the known heterogeneous distribution of nutrients on the leaf surface.

Collectively, these findings provide a rich understanding of the leaf habitats encountered by *P. syringae*, and likely other foliar pathogens, and of the adaptations that *P. syringae* has evolved to exploit these habitats. This knowledge should improve the forecasting of foliar disease based on predicting factors that influence inoculum development and should contribute to strategies for altering pathogen behavior and controlling foliar diseases.





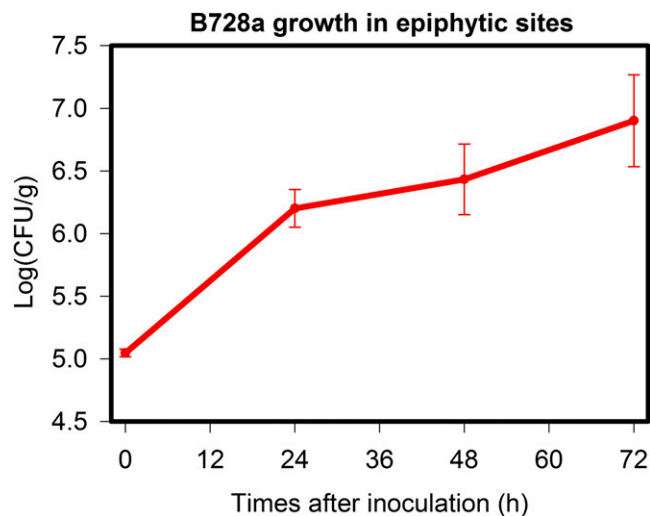

**Fig. S5.** Evaluation of conditions used to generate epiphytic populations of B728a cells on bean leaves. Cells were grown in HMM-basal medium, washed twice in HMM-basal medium lacking  $\text{FeCl}_3$ ,  $\text{NH}_3$ , glutamine, and  $N$ -( $\beta$ -ketocaproyl)-L-homoserine lactone (AHL), and diluted in water containing 0.01% Silwet L-77 to a density of  $1 \times 10^6$  cells/mL. Plants were grown at a high density (10 plants per 4-in pot) until their primary leaves were fully expanded. They were inoculated with B728a cells by submerging the leaves in 1 L of the inoculum for 20 s, enclosing each pot in a plastic bag to create a tent, and incubating the pots on a laboratory bench at 25 °C for 24 h. The bags were removed, and the plants were incubated at 25 °C for 48 h at the ambient relative humidity. The cells were recovered from four leaves by sonication and were enumerated by plating on King's B agar containing rifampin (50  $\mu\text{g}/\text{mL}$ ) and cycloheximide (100  $\mu\text{g}/\text{mL}$ ). The final protocol for collecting epiphytic cells varied from this inoculation scheme as described in *Methods*; most importantly, it was performed at a higher relative humidity to enhance the number of cells recovered from the leaves.

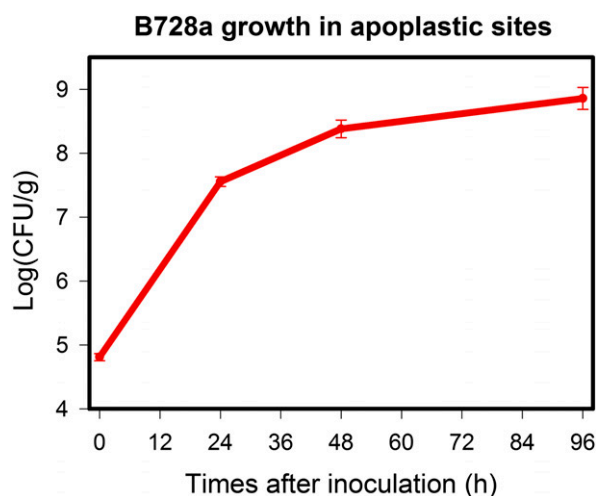

**Fig. S6.** Evaluation of conditions used to generate apoplastic populations of B728a cells in bean leaves. Plants were grown and inoculum was prepared as described in the legend of Fig. S5. B728a cells were inoculated by submerging the plants in 500 mL of the inoculum, subjecting the submerged plants to a vacuum for  $\sim 2$  min, and then gently releasing the vacuum and leaving the plants submerged until they were infiltrated with the bacterial suspension. The plants then were removed from the inoculum and allowed to dry on a laboratory bench. The plants were incubated for 48 h under plant growth lights with a 12-h photoperiod. The cells were recovered from eight leaves by homogenization and were enumerated by plating as described in the legend of Fig. S5. The final protocol for collecting apoplastic cells involved this inoculation scheme and sampling at the 48-h time point.
